# Supplementary material for: Nexus between Water Security Framework and Public Health: A Comprehensive Scientific Review
Source: MDPI journal article supplement (doi:10.3390/w13101365), 2021-05-14
Supplement: s1 [file s1]

**Table S1.** List of reviewed papers (from the Scopus search) associated with different water security dimensions.

| S. No. | Water Security Dimensions     | Key Reference Papers                                                                                                                                                                                                                                                                                                                                                                                                                                                                                                       |
|--------|-------------------------------|----------------------------------------------------------------------------------------------------------------------------------------------------------------------------------------------------------------------------------------------------------------------------------------------------------------------------------------------------------------------------------------------------------------------------------------------------------------------------------------------------------------------------|
| 1      | Water quality                 | Kumar, 2019 [1]; UN Water, 2013 [2]; Jalilov et al., 2018 [3]; Avtar et al., 2019 [4]; Bichai and Smeets, 2013 [5]; Grady et al., 2019 [6]; Gunda et al., 2019 [7]; Holding et al., 2017 [8]; Kumar, 2015 [9]; Kumar et al., 2016a [10]; Kumar et al., 2012 [11]; Medeiros et al., 2016 [12]                                                                                                                                                                                                                               |
| 2      | Water quantity                | UNESCO and UNESCO ICWSSM, 2019 [13]; Aboelnga et al., 2020 [14]; Saidmamatov et al., 2020 [15]; Hoeskstra et al., 2018 [16]; Nilsson et al., 2013b [17]                                                                                                                                                                                                                                                                                                                                                                    |
| 3      | Availability                  | Miguel et al., 2020 [18]; Islam et al., 2020 [19]; Babel et al., 2020 [20]; Mushavi et al., 2020 [21]; Giwa and Dindi, 2017 [22]; Onishi, 2011 [23]; Shamsudduha et al., 2018 [24];                                                                                                                                                                                                                                                                                                                                        |
| 4      | Accessibility                 | Diaz-Caravantes et al., 2020 [25]; Nepal et al., 2021 [26]; Islam et al., 2014 [27]; Nicholas and Dyer, 2013 [28]                                                                                                                                                                                                                                                                                                                                                                                                          |
| 5      | Infrastructure and technology | Bichai et al., 2018 [29]; Aberilla et al., 2020 [30]; Kumar et al., 2016b [10]; Kumar et al., 2016 [31]; Liu et al., 2016 [32]; Pagano et al., 2014 [33]; Zodrow et al., 2017 [34]                                                                                                                                                                                                                                                                                                                                         |
| 6      | Socio-economic                | Smit et al., 2019 [35]; Crow and Odaba, 2010 [36]; Deshpande et al., 2019 [37]; Romero-Lankao and Gnatz, 2016 [38]; Rosinger et al., 2018 [39]; Brewis et al., 2020 [40]; Dadson et al., 2017 [41]; Ding et al., 2019 [42]; Penn et al., 2017 [43]                                                                                                                                                                                                                                                                         |
| 7      | Risks/hazards                 | Danielaini et al., 2019 [44]; Garrick and Hall (2014) [45]; Gheuens et al., 2019 [46]; Mishra et al., 2021 [47]; Scocca, 2019 [48]                                                                                                                                                                                                                                                                                                                                                                                         |
| 8      | Ecosystem                     | Gerlak et al., 2018 [49]; Qin et al., 2019 [50]; Brewis et al., 2020 [40]; Nicholas et al., 2020 [51]; Vogl et al., 2017 [52]                                                                                                                                                                                                                                                                                                                                                                                              |
| 9      | Policy and governance         | Pandey et al., 2019 [53]; Kumar et al. 2020 [54]; Gain et al., 2016 [55]; Aboelnga et al., 2019 [56]; Amorim et al., 2018 [57]; Chiluwe and Claassen, 2020 [58]; Jiang, 2015 [59]; Latchmore et al., 2018 [60]; Lu et al., 2018 [61]; Norman et al., 2012 [62]                                                                                                                                                                                                                                                             |
| 10     | Sanitation and hygiene        | Bradley and Bartram, 2013 [63]; Garcia-Sanchez and Guereca, 2019 [64]; Mukherjee et al., 2020 [65]; Oerther et al., 2019 [66]; Quinn et al., 2018 [67]                                                                                                                                                                                                                                                                                                                                                                     |
| 11     | Public health                 | Stanwell-Smith, 2009 [68]; Marttunen et al., 2019 [69]; Nilsson et al., 2013a [70]; Krueger et al., 2019 [71]; Marcantonio, 2019 [72]; Munoz et al., 2015 [73]; Khan et al., 2020 [74]; Aboelnga et al., 2019 [56]; Romero-Lankao and Gnatz, 2016 [38]; Chowdhury et al., 2016 [75]; Kumar et al., 2010 [76]; Avtar et al., 2020 [77]; Haghighatdoost et al., 2018 [78]; Pross et al., 2014 [79]; Ganio et al., 2011 [80]; Aihara et al., 2016 [81]; Liu et al., 2016 [82]; Maxfield, 2020 [83]; Nilsson et al., 2013 [84] |

## References

1. Kumar, P. Numerical quantification of current status quo and future prediction of water quality in eight Asian megacities: Challenges and opportunities for sustainable water management. *Environ. Monit. Assess.* **2019**, *191*, 319, doi:10.1007/s10661-019-7497-x.
2. UN Water. *Water Security and the Global Water Agenda*; UNU-INWEH: Hamilton, ON, Canada, 2013; pp. 38. ISBN-9789280860382.
3. Jalilov, S.-M.; Kefi, M.; Kumar, P.; Masago, Y.; Mishra, B.K. Sustainable Urban Water Management: Application for Integrated Assessment in Southeast Asia. *Sustainability* **2018**, *10*, 122, doi:10.3390/su10010122.
4. Avtar, R.; Aggarwal, R.; Kharrazi, A.; Kumar, P.; Kurniawan, T.A. Utilizing geospatial information to implement SDGs and monitor their Progress. *Environ. Monit. Assess.* **2020**, *192*, 35, doi:10.1007/s10661-019-7996-9.
5. Bichai, F.; Smeets, P.W. Using QMRA-based regulation as a water quality management tool in the water security challenge: Experience from the Netherlands and Australia. *Water Res.* **2013**, *47*, 7315–7326, doi:10.1016/j.watres.2013.09.062.

6. Grady, C.A.; Blumsack, S.; Mejia, A.; Peters, C.A. The Food–Energy–Water Nexus: Security, Sustainability, and Systems Perspectives. *Environ. Eng. Sci.* **2019**, *36*, 761–762, doi:10.1089/ees.2019.0170.
7. Gunda, T.; Hess, D.; Hornberger, G.M.; Worland, S. Water security in practice: The quantity-quality-society nexus. *Water Secur.* **2019**, *6*, 100022, doi:10.1016/j.wasec.2018.100022.
8. Holding, S.; Allen, D.M.; Notte, C.; Olewiler, N. Enhancing water security in a rapidly developing shale gas region. *J. Hydrol. Reg. Stud.* **2017**, *11*, 266–277, doi:10.1016/j.ejrh.2015.09.005.
9. Kumar, P. Hydrocomplexity: Addressing water security and emergent environmental risks. *Water Resour. Res.* **2015**, *51*, 5827–5838, doi:10.1002/2015wr017342.
10. Kumar, P.; Kumar, A.; Singh, C.K.; Saraswat, C.; Avtar, R.; Ramanathan, A.L.; Herath, S. Hydrogeochemical Evolution and Appraisal of Groundwater Quality in Panna District, Central India. *Expo. Health* **2016**, *8*, 19–30, doi:10.1007/s12403-015-0179-1.
11. Kumar, P.; Tsujimura, M.; Nakano, T.; Minoru, T. The effect of tidal fluctuation on ground water quality in coastal aquifer of Saijo plain, Ehime prefecture, Japan. *Desalination* **2012**, *286*, 166–175, doi:10.1016/j.desal.2011.11.017.
12. Medeiros, A.S.; Wood, P.; Wesche, S.D.; Bakaic, M.; Peters, J.F. Water security for northern peoples: Review of threats to Arctic freshwater systems in Nunavut, Canada. *Reg. Environ. Chang.* **2017**, *17*, 635–647, doi:10.1007/s10113-016-1084-2.
13. UNESCO and UNESCO International Centre for Water Security and Sustainable Management (UNESCO and UNESCO ICWSSM). *Water Security and Sustainable Development Goals. Global Water Security Issues Series; I-WSSM*; UNESCO: Paris, France; Daejeon, Korea, 2019; p. 210. ISBN-9789231003233.
14. Aboelnga, H.T.; El-Naser, H.; Ribbe, L.; Frechen, F.-B. Assessing Water Security in Water-Scarce Cities: Applying the Integrated Urban Water Security Index (IUWSI) in Madaba, Jordan. *Water* **2020**, *12*, 1299, doi:10.3390/w12051299.
15. Saidmamatov, O.; Rudenko, I.; Pfister, S.; Koziel, J. Water–Energy–Food Nexus Framework for Promoting Regional Integration in Central Asia. *Water* **2020**, *12*, 1896, doi:10.3390/w12071896.
16. Hoekstra, A.Y.; Buurman, J.; Van Ginkel, K.C. Urban water security: A review. *Environ. Res. Lett.* **2018**, *13*, 053002, doi:10.1088/1748-9326/aaba52.
17. Nichols, S.J.; Dyer, F.J. Contribution of national bioassessment approaches for assessing ecological water security: An AUSRIVAS case study. *Front. Environ. Sci. Eng.* **2013**, *7*, 669–687, doi:10.1007/s11783-013-0556-6.
18. De Miguel, A.; Froebrich, J.; Jaouani, A.; Souissi, Y.; Elmahdi, A.; Mateo-Sagasta, J.; Al-Hamdi, M.; Frascari, D. Innovative Research Approaches to Cope with Water Security in Africa. *Integr. Environ. Assess. Manag.* **2020**, *16*, 853–855, doi:10.1002/ieam.4337.
19. Islam, A.R.M.T.; Siddiqua, M.T.; Zahid, A.; Tasnim, S.S.; Rahman, M. Drinking appraisal of coastal groundwater in Bangladesh: An approach of multi-hazards towards water security and health safety. *Chemosphere* **2020**, *255*, 126933, doi:10.1016/j.chemosphere.2020.126933.
20. Babel, M.S.; Shinde, V.R.; Sharma, D.; Dang, N.M. Measuring water security: A vital step for climate change adaptation. *Environ. Res.* **2020**, *185*, 109400, doi:10.1016/j.envres.2020.109400.
21. Mushavi, R.C.; Burns, B.F.; Kakuhikire, B.; Owembabazi, M.; Vořechovská, D.; McDonough, A.Q.; Cooper-Vince, C.E.; Baguma, C.; Rasmussen, J.D.; Bangsberg, D.R.; et al. “When you have no water, it means you have no peace”: A mixed-methods, whole-population study of water insecurity and depression in rural Uganda. *Soc. Sci. Med.* **2020**, *245*, 112561, doi:10.1016/j.socscimed.2019.112561.
22. Giwa, A.; Dindi, A. An investigation of the feasibility of proposed solutions for water sustainability and security in water-stressed environment. *J. Clean. Prod.* **2017**, *165*, 721–733.
23. Onishi, K. Reassessing Water Security in the Mekong: The Chinese Rapprochement with Southeast Asia. *J. Nat. Resour. Policy Res.* **2011**, *3*, 393–412, doi:10.1080/19390459.2011.607962.
24. Shamsudduha, M.; Zahid, A.; Burgess, W.G. Security of deep groundwater against arsenic contamination in the Bengal Aquifer System: A numerical modeling study in southeast Bangladesh. *Sustain. Water Resour. Manag.* **2018**, *5*, 1073–1087, doi:10.1007/s40899-018-0275-z.
25. Díaz-Caravantes, R.E.; Zuniga-Teran, A.; Martín, F.; Bernabeu, M.; Stoker, P.; Scott, C. Urban water security: A comparative study of cities in the arid Americas. *Environ. Urban.* **2020**, *32*, 275–294, doi:10.1177/0956247819900468.
26. Nepal, S.; Neupane, N.; Belbase, D.; Pandey, V.P.; Mukherji, A. Achieving water security in Nepal through unravelling the water-energy-agriculture nexus. *Int. J. Water Resour. Dev.* **2021**, *37*, 67–93, doi:10.1080/07900627.2019.1694867.
27. Islam, M.S.; Sadiq, R.; Rodriguez, M.J.; Najjaran, H.; Hoorfar, M. Reliability Assessment for Water Supply Systems under Uncertainties. *J. Water Resour. Plan. Manag.* **2014**, *140*, 468–479, doi:10.1061/(asce)wr.1943-5452.0000349.
28. Nichols, S.J.; Dyer, F.J. Contribution of national bioassessment approaches for assessing ecological water security: An AUSRIVAS case study. *Front. Environ. Sci. Eng.* **2013**, *7*, 669–687, doi:10.1007/s11783-013-0556-6.

29. Bichai, F.; Grindle, A.K.; Murthy, S.L. Addressing barriers in the water-recycling innovation system to reach water security in arid countries. *J. Clean. Prod.* **2018**, *171*, S97–S109, doi:10.1016/j.jclepro.2016.07.062.
30. Aberilla, J.M.; Gallego-Schmid, A.; Stamford, L.; Azapagic, A. An integrated sustainability assessment of synergistic supply of energy and water in remote communities. *Sustain. Prod. Consum.* **2020**, *22*, 1–21, doi:10.1016/j.spc.2020.01.003.
31. Kumar, P.; Herath, S.; Avtar, R.; Takeuchi, K. Mapping of groundwater potential zones in Killinochi area, Sri Lanka, using GIS and remote sensing techniques. *Sustain. Water Resour. Manag.* **2016**, *2*, 419–430, doi:10.1007/s40899-016-0072-5.
32. Liu, F.; Huang, G.; Sun, J.; Jing, J.; Zhang, Y.; Fan, L.; Guanxing, H.; Jichao, S.; Jihong, J.; Ying, Z. A New Evaluation Method for Groundwater Quality Applied in Guangzhou Region, China: Using Fuzzy Method Combining Toxicity Index. *Water Environ. Res.* **2016**, *88*, 99–106, doi:10.2175/106143015x14362865227832.
33. Pagano, A.; Giordano, R.; Portoghese, I.; Fratino, U.; Vurro, M. A Bayesian vulnerability assessment tool for drinking water mains under extreme events. *Nat. Hazards* **2014**, *74*, 2193–2227, doi:10.1007/s11069-014-1302-5.
34. Zodrow, K.R.; Li, Q.; Buono, R.M.; Chen, W.; Daigger, G.; Dueñas-Osorio, L.; Elimelech, M.; Huang, X.; Jiang, G.; Kim, J.-H.; et al. Advanced Materials, Technologies, and Complex Systems Analyses: Emerging Opportunities to Enhance Urban Water Security. *Environ. Sci. Technol.* **2017**, *51*, 10274–10281, doi:10.1021/acs.est.7b01679.
35. Smit, S.; Musango, J.K.; Kovacic, Z.; Brent, A.C. Towards Measuring the Informal City: A Societal Metabolism Approach. *J. Ind. Ecol.* **2018**, *23*, 674–685, doi:10.1111/jiec.12776.
36. Crow, B.; Odaba, E. Access to water in a Nairobi slum: women’s work and institutional learning. *Water Int.* **2010**, *35*, 733–747, doi:10.1080/02508060.2010.533344.
37. Deshpande, T.; Michael, K.; Bhaskara, K. Barriers and enablers of local adaptive measures: A case study of Bengaluru’s informal settlement dwellers. *Int. J. Justice Sustain.* **2018**, *24*, 167–179, doi:10.1080/13549839.2018.1555578.
38. Romero-Lankao, P.; Gnat, D.M. Conceptualizing urban water security in an urbanizing world. *Curr. Opin. Environ. Sustain.* **2016**, *21*, 45–51, doi:10.1016/j.cosust.2016.11.002.
39. Rosinger, A.Y.; Chang, A.-M.; Buxton, O.M.; Li, J.; Wu, S.; Gao, X. Short sleep duration is associated with inadequate hydration: Cross-cultural evidence from US and Chinese adults. *Sleep* **2018**, *42*, zsy210, doi:10.1093/sleep/zsy210.
40. Brewis, A.A.; Piperata, B.; Thompson, A.L.; Wutich, A. Localizing resource insecurities: A biocultural perspective on water and wellbeing. *Wiley Interdiscip. Rev. Water* **2020**, *7*, doi:10.1002/wat2.1440.
41. Dadson, S.; Hall, J.W.; Garrick, D.; Sadoff, C.; Grey, D.; Whittington, D. Water security, risk, and economic growth: Insights from a dynamical systems model. *Water Resour. Res.* **2017**, *53*, 6425–6438, doi:10.1002/2017wr020640.
42. Ding, K.J.; Gunda, T.; George, M.H.; Hornberger, G.M. Prominent Influence of Socioeconomic and Governance Factors on the Food-Energy-Water Nexus in sub-Saharan Africa. *Earth’s Future* **2019**, *7*, 1071–1087, doi:10.1029/2019ef001184.
43. Penn, H.J.; Loring, P.A.; Schnabel, W.E. Diagnosing water security in the rural North with an environmental security framework. *J. Environ. Manag.* **2017**, *199*, 91–98, doi:10.1016/j.jenvman.2017.04.088.
44. Danielaini, T.T.; Maheshwari, B.; Hagare, D. An assessment of household water insecurity in a rapidly developing coastal metropolitan region of Indonesia. *Sustain. Cities Soc.* **2019**, *46*, 101382, doi:10.1016/j.scs.2018.12.010.
45. Garrick, D.; Hall, J.W. Water Security and Society: Risks, Metrics, and Pathways. *Annu. Rev. Environ. Resour.* **2014**, *39*, 611–639, doi:10.1146/annurev-environ-013012-093817.
46. Gheuens, J.; Nagabhatla, N.; Perera, E.D.P. Disaster-Risk, Water Security Challenges and Strategies in Small Island Developing States (SIDS). *Water* **2019**, *11*, 637, doi:10.3390/w11040637.
47. Mishra, B.; Kumar, P.; Saraswat, C.; Chakraborty, S.; Gautam, A. Water Security in a Changing Environment: Concept, Challenges and Solutions. *Water* **2021**, *13*, 490, doi:10.3390/w13040490.
48. Scocca, G. Strengthening International Water Security: The European Union’s proposal. *World Water Policy* **2019**, *5*, 192–206, doi:10.1002/wwp2.12014.
49. Gerlak, A.K.; House-Peters, L.; Varady, R.G.; Albrecht, T.; Zúñiga-Terán, A.; De Grenade, R.R.; Cook, C.; Scott, C.A. Water security: A review of place-based research. *Environ. Sci. Policy* **2018**, *82*, 79–89, doi:10.1016/j.envsci.2018.01.009.
50. Qin, K.; Liu, J.; Yan, L.; Huang, H. Integrating ecosystem services flows into water security simulations in water scarce areas: Present and future. *Sci. Total Environ.* **2019**, *670*, 1037–1048, doi:10.1016/j.scitotenv.2019.03.263.
51. Nicholas, K.; Bentley, M.; Terán, E.; Thompson, A. Water Security in the Galápagos: Socioecological Determinants and Health Implications. *EcoHealth* **2019**, *17*, 111–124, doi:10.1007/s10393-019-01456-w.

52. Vogl, A.L.; Goldstein, J.H.; Daily, G.C.; Vira, B.; Bremer, L.; McDonald, R.I.; Shemie, D.; Tellman, B.; Cassin, J. Mainstreaming investments in watershed services to enhance water security: Barriers and opportunities. *Environ. Sci. Policy* **2017**, *75*, 19–27, doi:10.1016/j.envsci.2017.05.007.
53. Pandey, C.L.; Maskey, G.; Devkota, K.; Ojha, H. Investigating the Institutional Landscape for Urban Water Security in Nepal. *Sustain. J. Rec.* **2019**, *12*, 173–181, doi:10.1089/sus.2019.0007.
54. Kumar, P.; Avtar, R.; Dasgupta, R.; Johnson, B.A.; Mukherjee, A.; Ahsan, N.; Nguyen, D.C.H.; Nguyen, H.Q.; Shaw, R.; Mishra, B.K. Socio-hydrology: A key approach for adaptation to water scarcity and achieving human well-being in large riverine islands. *Prog. Disaster Sci.* **2020**, *8*, 100134, doi:10.1016/j.pdisas.2020.100134.
55. Gain, A.K.; Giupponi, C.; Wada, Y. Measuring global water security towards sustainable development goals. *Environ. Res. Lett.* **2016**, *11*, 124015, doi:10.1088/1748-9326/11/12/124015.
56. Aboelnga, H.T.; Ribbe, L.; Frechen, F.-B.; Saghier, J. Urban Water Security: Definition and Assessment Framework. *Resources* **2019**, *8*, 178, doi:10.3390/resources8040178.
57. De Amorim, W.S.; Valduga, I.B.; Ribeiro, J.M.P.; Williamson, V.G.; Krauser, G.E.; Magtoto, M.K.; Guerra, J.B.S.O.D.A. The nexus between water, energy, and food in the context of the global risks: An analysis of the interactions between food, water, and energy security. *Environ. Impact Assess. Rev.* **2018**, *72*, 1–11, doi:10.1016/j.eiar.2018.05.002.
58. Chiluwe, Q.W.; Claassen, M. Systems perspectives on water security: An applied review and conceptual framework. *Environ. Policy Gov.* **2020**, *30*, 332–344, doi:10.1002/eet.1889.
59. Jiang, Y. China's water security: Current status, emerging challenges and future prospects. *Environ. Sci. Policy* **2015**, *54*, 106–125, doi:10.1016/j.envsci.2015.06.006.
60. Latchmore, T.; Schuster-Wallace, C.J.; Longboat, D.R.; Dickson-Anderson, S.E.; Majury, A. Critical elements for local Indigenous water security in Canada: A narrative review. *J. Water Health* **2018**, *16*, 893–903, doi:10.2166/wh.2018.107.
61. Lu, H.; Li, J.; Ren, L.; Chen, Y. Optimal groundwater security management policies by control of inexact health risks under dual uncertainty in slope factors. *Chemosphere* **2018**, *198*, 161–173, doi:10.1016/j.chemosphere.2018.01.121.
62. Norman, E.S.; Dunn, G.; Bakker, K.; Allen, D.M.; De Albuquerque, R.C. Water Security Assessment: Integrating Governance and Freshwater Indicators. *Water Resour. Manag.* **2013**, *27*, 535–551, doi:10.1007/s11269-012-0200-4.
63. Bradley, D.J.; Bartram, J.K. Domestic water and sanitation as water security: Monitoring, concepts and strategy. *Philos. Trans. R. Soc. A Math. Phys. Eng. Sci.* **2013**, *371*, 20120420, doi:10.1098/rsta.2012.0420.
64. García-Sánchez, M.; Güereca, L.P. Environmental and social life cycle assessment of urban water systems: The case of Mexico City. *Sci. Total Environ.* **2019**, *693*, 133464, doi:10.1016/j.scitotenv.2019.07.270.
65. Mukherjee, S.; Sundberg, T.; Schütt, B. Assessment of Water Security in Socially Excluded Areas in Kolkata, India: An Approach Focusing on Water, Sanitation and Hygiene. *Water* **2020**, *12*, 746, doi:10.3390/w12030746.
66. Oerther, D.B.; Voth-Gaeddert, L.E.; Divilbiss, D.W. Improving Environmental Health Practice and Policy Through Convergence Research: A Case Study of Linked Food–Water Systems Enhancing Child Health. *Environ. Eng. Sci.* **2019**, *36*, 820–832, doi:10.1089/ees.2019.0058.
67. Quinn, R.; Avis, O.; Decker, M.; Parker, A.; Cairncross, S. An Assessment of the Microbiological Water Quality of Sand Dams in Southeastern Kenya. *Water* **2018**, *10*, 708, doi:10.3390/w10060708.
68. Stanwell-Smith, R. Classification of Water-Related Disease. In *Biological, Physiological and Health Sciences, Encyclopedia of Life Support Systems (EOLSS), Developed under the Auspices of the UNESCO, 2009*; Grabow, W.O.K., Ed.; Eolss Publishers: Paris, France, 2009.
69. Marttunen, M.; Mustajoki, J.; Sojamo, S.; Ahopelto, L.; Keskinen, M. A Framework for Assessing Water Security and the Water–Energy–Food Nexus—The Case of Finland. *Sustainability* **2019**, *11*, 2900, doi:10.3390/su11102900.
70. Nilsson, L.M.; Destouni, G.; Berner, J.; Dudarev, A.A.; Mulvad, G.; Odland, J.Ø.; Parkinson, A.; Tikhonov, C.; Rautio, A.; Evengård, B. A Call for Urgent Monitoring of Food and Water Security Based on Relevant Indicators for the Arctic. *Ambio* **2013**, *42*, 816–822, doi:10.1007/s13280-013-0427-1.
71. Krueger, E.; Rao, P.S.C.; Borchardt, D. Quantifying urban water supply security under global change. *Glob. Environ. Chang.* **2019**, *56*, 66–74, doi:10.1016/j.gloenvcha.2019.03.009.
72. Marcantonio, R.A. Water, anxiety, and the human niche: A study in Southern Province, Zambia. *Clim. Dev.* **2019**, *12*, 310–322, doi:10.1080/17565529.2019.1617664.
73. Muñoz, C.X.; Johnson, E.C.; McKenzie, A.L.; Guelinckx, I.; Graverholt, G.; Casa, D.J.; Maresh, C.M.; Armstrong, L.E. Habitual total water intake and dimensions of mood in healthy young women. *Appetite* **2015**, *92*, 81–86, doi:10.1016/j.appet.2015.05.002.
74. Khan, S.; Guan, Y.; Khan, F.; Khan, Z. A Comprehensive Index for Measuring Water Security in an Urbanizing World: The Case of Pakistan's Capital. *Water* **2020**, *12*, 166, doi:10.3390/w12010166.

75. Chowdhury, S.; Mazumder, M.J.; Al-Attas, O.; Husain, T. Heavy metals in drinking water: Occurrences, implications, and future needs in developing countries. *Sci. Total Environ.* **2016**, 569–570, 476–488, doi:10.1016/j.scitotenv.2016.06.166.
76. Kumar, P.; Kumar, M.; Ramanathan, A.L.; Tsujimura, M. Tracing the factors responsible for arsenic enrichment in groundwater of the middle Gangetic Plain, India: A source identification perspective. *Environ. Geochem. Health* **2009**, 32, 129–146, doi:10.1007/s10653-009-9270-5.
77. Avtar, R.; Kumar, P.; Supe, H.; Jie, D.; Sahu, N.; Mishra, B.K.; Yunus, A.P. Did the COVID-19 Lockdown-Induced Hydrological Residence Time Intensify the Primary Productivity in Lakes? Observational Results Based on Satellite Remote Sensing. *Water* **2020**, 12, 2573, doi:10.3390/w12092573.
78. Haghighatdoost, F.; Feizi, A.; Esmailzadeh, A.; Rashidi-Pourfard, N.; Keshteli, A.H.; Roohafza, H.; Adibi, P. Drinking plain water is associated with decreased risk of depression and anxiety in adults: Results from a large cross-sectional study. *World J. Psychiatry* **2018**, 8, 88–96, doi:10.5498/wjp.v8.i3.88.
79. Pross, N.; Demazières, A.; Girard, N.; Barnouin, R.; Metzger, D.; Klein, A.; Perrier, E.; Guelinckx, I. Effects of Changes in Water Intake on Mood of High and Low Drinkers. *PLoS ONE* **2014**, 9, e94754, doi:10.1371/journal.pone.0094754.
80. Ganio, M.S.; Armstrong, L.E.; Casa, D.J.; McDermott, B.P.; Lee, E.C.; Yamamoto, L.M.; Marzano, S.; Lopez, R.M.; Jimenez, L.; Le Bellego, L.; et al. Mild dehydration impairs cognitive performance and mood of men. *Br. J. Nutr.* **2011**, 106, 1535–1543, doi:10.1017/s0007114511002005.
81. Aihara, Y.; Shrestha, S.; Sharma, J. Household water insecurity, depression and quality of life among postnatal women living in urban Nepal. *J. Water Health* **2015**, 14, 317–324, doi:10.2166/wh.2015.166.
82. Liu, F.; Huang, G.; Sun, J.; Jing, J.; Zhang, Y.; Fan, L.; Guanxing, H.; Jichao, S.; Jihong, J.; Ying, Z. A New Evaluation Method for Groundwater Quality Applied in Guangzhou Region, China: Using Fuzzy Method Combining Toxicity Index. *Water Environ. Res.* **2016**, 88, 99–106, doi:10.2175/106143015x14362865227832.
83. Maxfield, A. Testing the theoretical similarities between food and water insecurity: Buffering hypothesis and effects on mental wellbeing. *Soc. Sci. Med.* **2020**, 244, 112412, doi:10.1016/j.socscimed.2019.112412.
84. Nilsson, L.M.; Berner, J.; Dudarev, A.A.; Mulvad, G.; Odland, J.Ø.; Parkinson, A.; Rautio, A.; Tikhonov, C.; Evengård, B. Indicators of food and water security in an Arctic Health context—Results from an international workshop discussion. *Int. J. Circumpolar Health* **2013**, 72, doi:10.3402/ijch.v72i0.21530.
